# Supplementary material for: Butyrate and Metformin Affect Energy Metabolism Independently of the Metabolic Phenotype in the Tumor Therapy Model
Source: MDPI journal article supplement (doi:10.3390/biom11121831), 2021-12-04
Supplement: s1 [file s1]

**Figure S1:** Giemsa stained cell clones. The isolated cell clones were cultivated for 16 days, fixed with methanol and stained with Giemsa solution.

**Control cell lines**

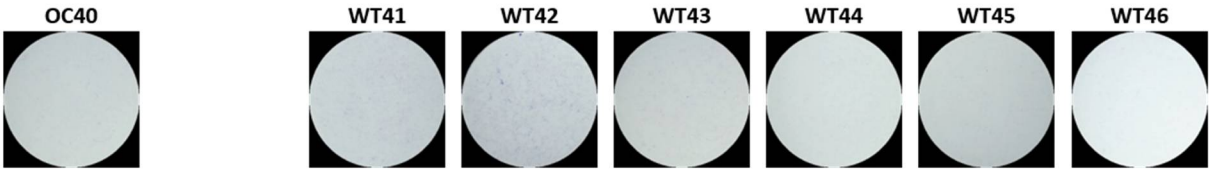

**MCA/TPA-treated cells without multilayered cell growth**

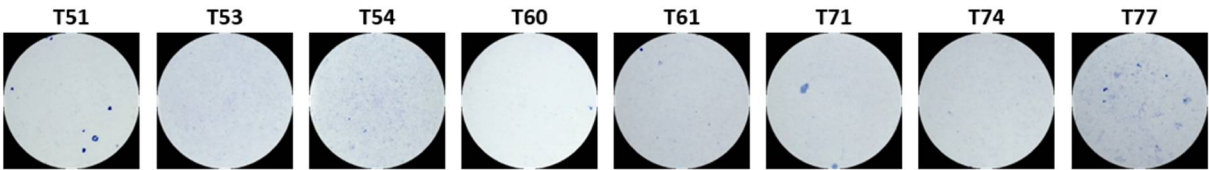

**Foci forming MCA/TPA-treated cells**

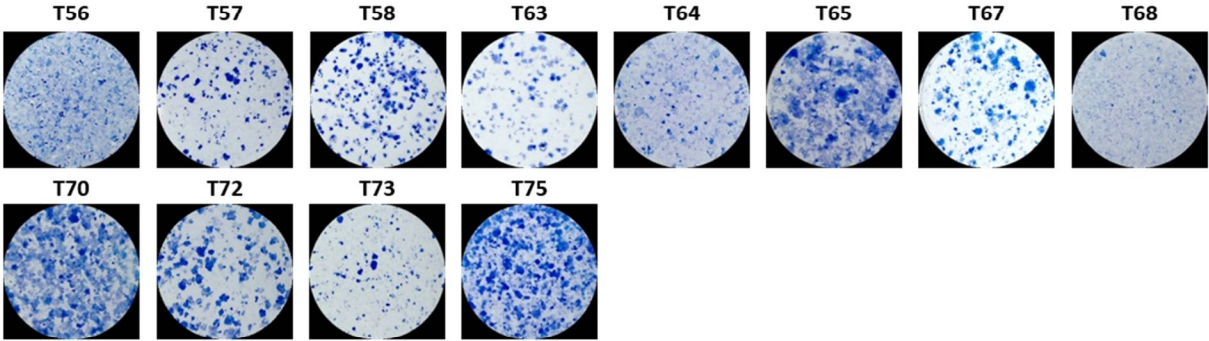

**MCA/TPA-treated cells with multilayered cell growth**

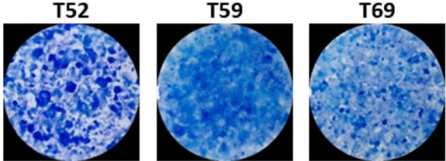

**Figure S2.** Seahorse results after treatment of cell clones with butyrate and metformin. Cell clones were seeded into 24 well Agilent Seahorse XF Cell Culture Microplates, treated with 1 mM butyrate or 1 mM metformin for 24 h following a Seahorse XF Cell Mito Stress assay. The oxygen consumption rates (OCR) are shown relative to untreated control cells for (A) WT44, (C) T52, (E) T58 and (G) T59 cells. The extracellular acidification rates (ECAR) are shown relative to untreated control cells for the clones (B) WT44, (D) T52, (F) T58 and (H) T59. Data are given as mean  $\pm$  SEM of three to four biological replicates.

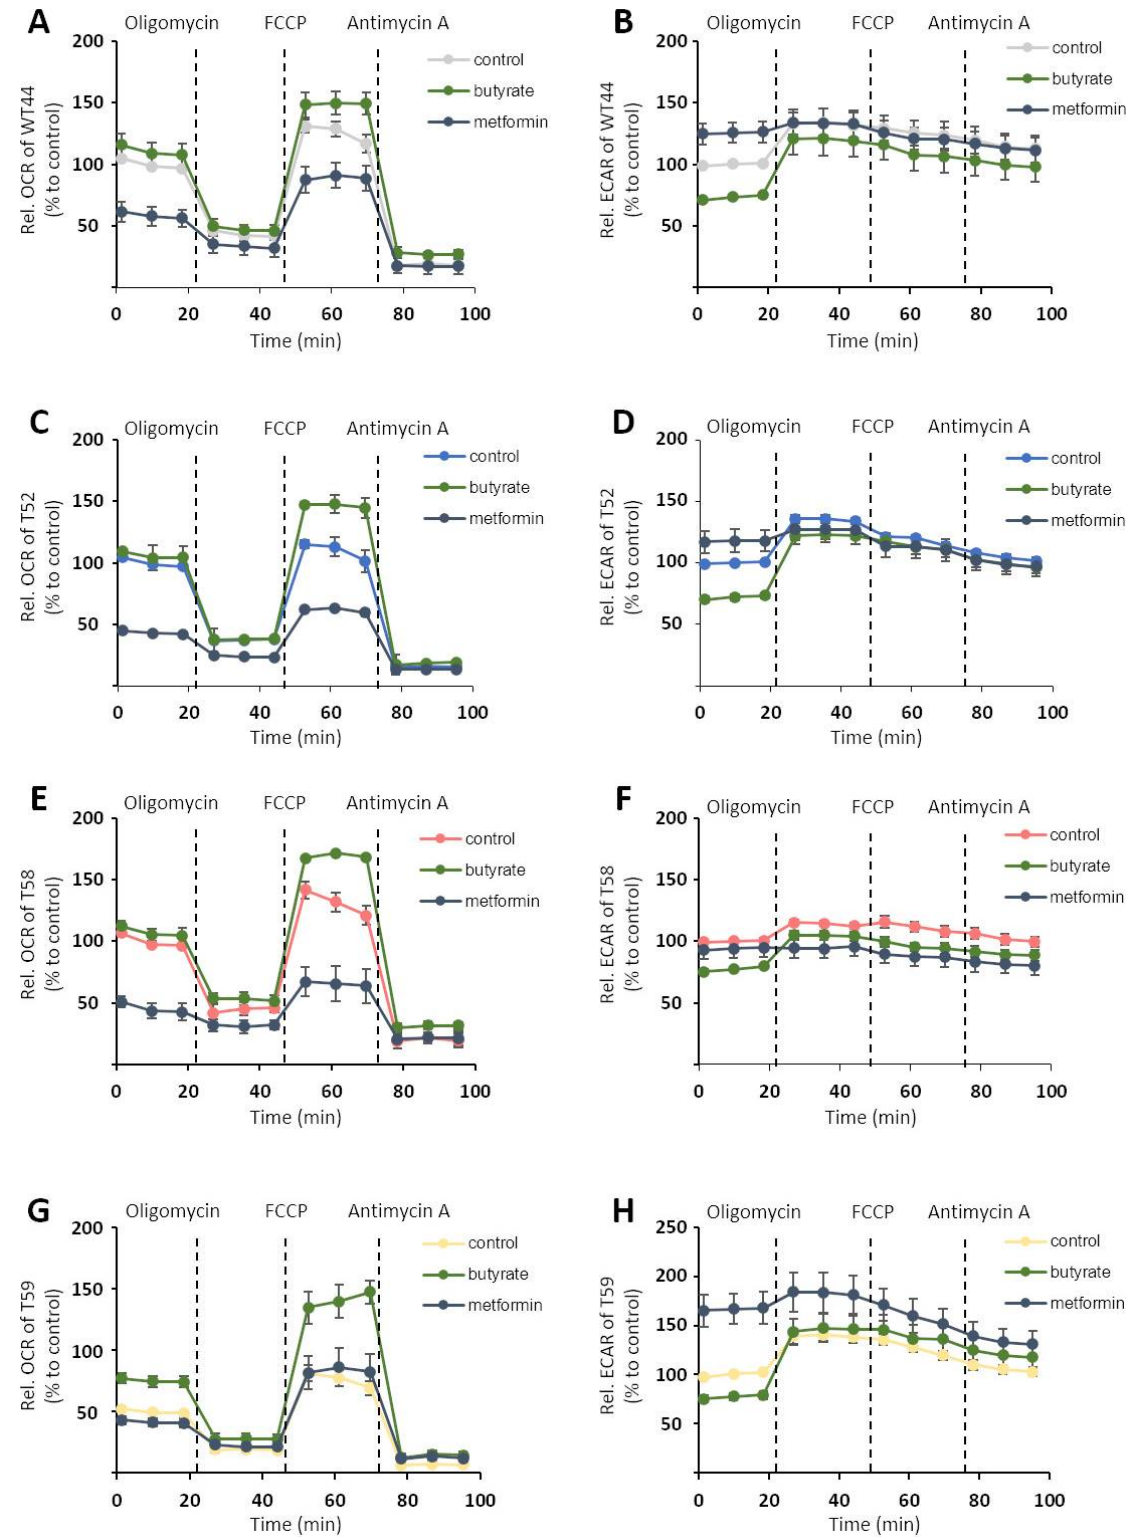

Table S1: Overview of the cell clones.

| Monoclonal cell line | Doubling time [h] | Growth characteristics                      |
|----------------------|-------------------|---------------------------------------------|
| OC40                 | 17,1              | Monolayer, post-confluent growth inhibition |
| WT41                 | 20,5              | Monolayer, post-confluent growth inhibition |
| WT42                 | 22,8              | Monolayer, post-confluent growth inhibition |
| WT43                 | 27,0              | Monolayer, post-confluent growth inhibition |
| WT44                 | 20,3              | Monolayer, post-confluent growth inhibition |
| WT45                 | 19,8              | Monolayer, post-confluent growth inhibition |
| WT46                 | 18,3              | Monolayer, post-confluent growth inhibition |
| T51                  | 20,9              | Monolayer, post-confluent growth inhibition |
| T52                  | 19,5              | Multilayer, highly invasive                 |
| T53                  | 17,9              | Monolayer, post-confluent growth inhibition |
| T54                  | 18,9              | Monolayer, post-confluent growth inhibition |
| T56                  | 14,3              | Small foci forming, clonal subpopulations   |
| T57                  | 15,4              | Foci forming, clonal subpopulations         |
| T58                  | 29,2              | Foci forming, clonal subpopulations         |
| T59                  | 12,9              | Multilayer, highly invasive                 |
| T60                  | 18,7              | Monolayer, post-confluent growth inhibition |
| T61                  | 14,5              | Monolayer, post-confluent growth inhibition |
| T63                  | 20,0              | Foci forming, clonal subpopulations         |
| T64                  | 18,5              | Small foci forming, clonal subpopulations   |
| T65                  | 17,1              | Foci forming, clonal subpopulations         |
| T67                  | 17,9              | Foci forming, clonal subpopulations         |
| T68                  | 19,7              | Small foci forming, clonal subpopulations   |
| T69                  | 13,3              | Multilayer, highly invasive                 |
| T70                  | 13,2              | Foci forming, clonal subpopulations         |
| T71                  | 17,4              | Monolayer, post-confluent growth inhibition |
| T72                  | 22,9              | Foci forming, clonal subpopulations         |
| T73                  | 21,5              | Foci forming, clonal subpopulations         |
| T74                  | 15,9              | Monolayer, post-confluent growth inhibition |
| T75                  | 17,9              | Foci forming, clonal subpopulations         |
| T77                  | 22,8              | Monolayer, post-confluent growth inhibition |
